# Supplementary material for: Intake of Fish and Marine n-3 Polyunsaturated Fatty Acids and Risk of Cardiovascular Disease Mortality: A Meta-Analysis of Prospective Cohort Studies
Source: MDPI journal article supplement (doi:10.3390/nu13072342), 2021-07-09
Supplement: s1 [file s1]

## Supporting Information

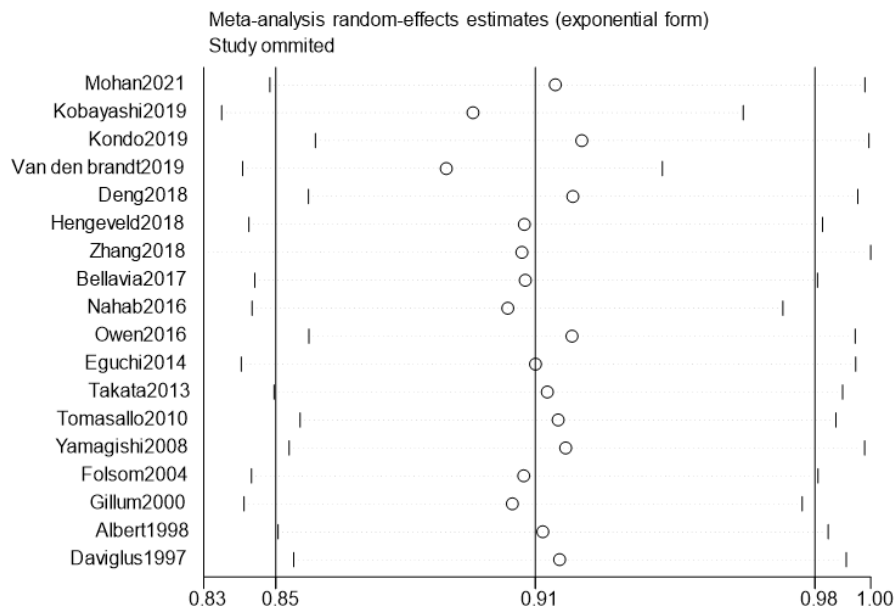

**Figure S1.** Sensitivity analysis with respect to fish intake and CVD mortality risk. Sensitivity analysis did not change the results. CVD, cardiovascular disease.

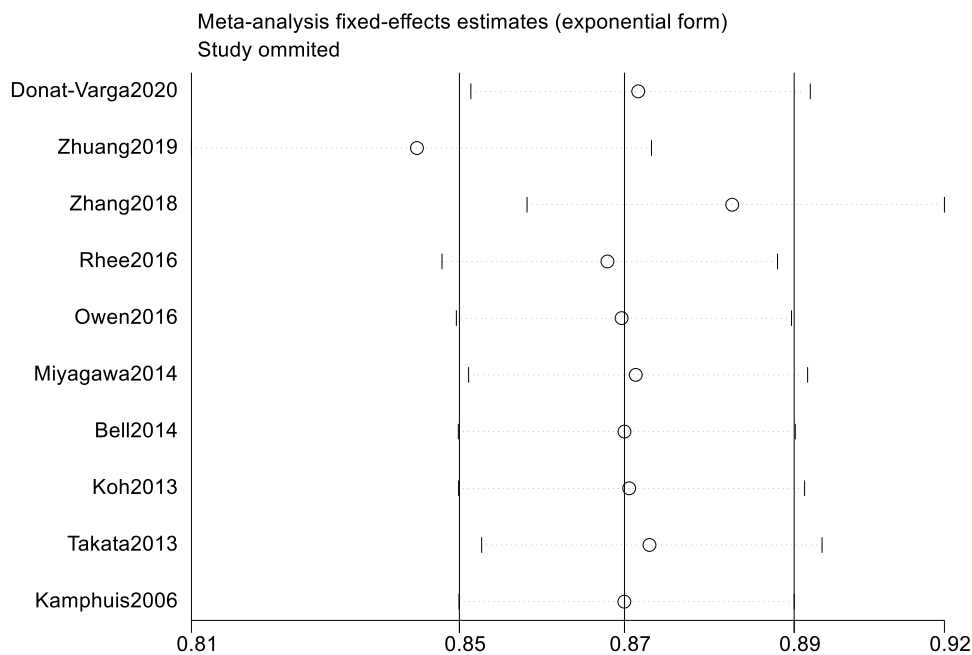

**Figure S2.** Sensitivity analysis with respect to marine n-3 PUFA intake and CVD mortality risk. The negative association between marine n-3 PUFA and risk of CVD mortality was altered from 0.87 (0.85-0.89) to 0.84 (0.81-0.87) by deleting the study of Zhuang2019. n-3 PUFA, n-3 polyunsaturated fatty acids; CVD, cardiovascular disease.

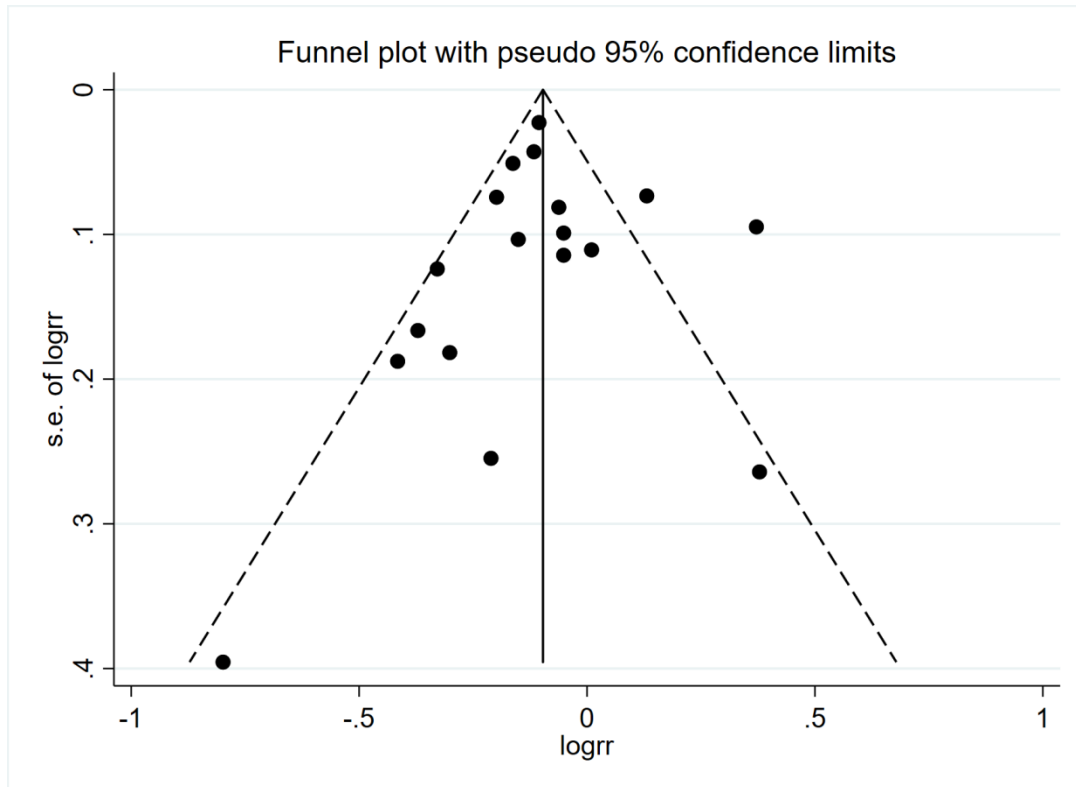

**Figure S3.** Funnel plot of the RR of 18 articles on fish intake and CVD mortality risk. No evidence of publication bias was noted. RR, relative risk; CVD, cardiovascular disease.

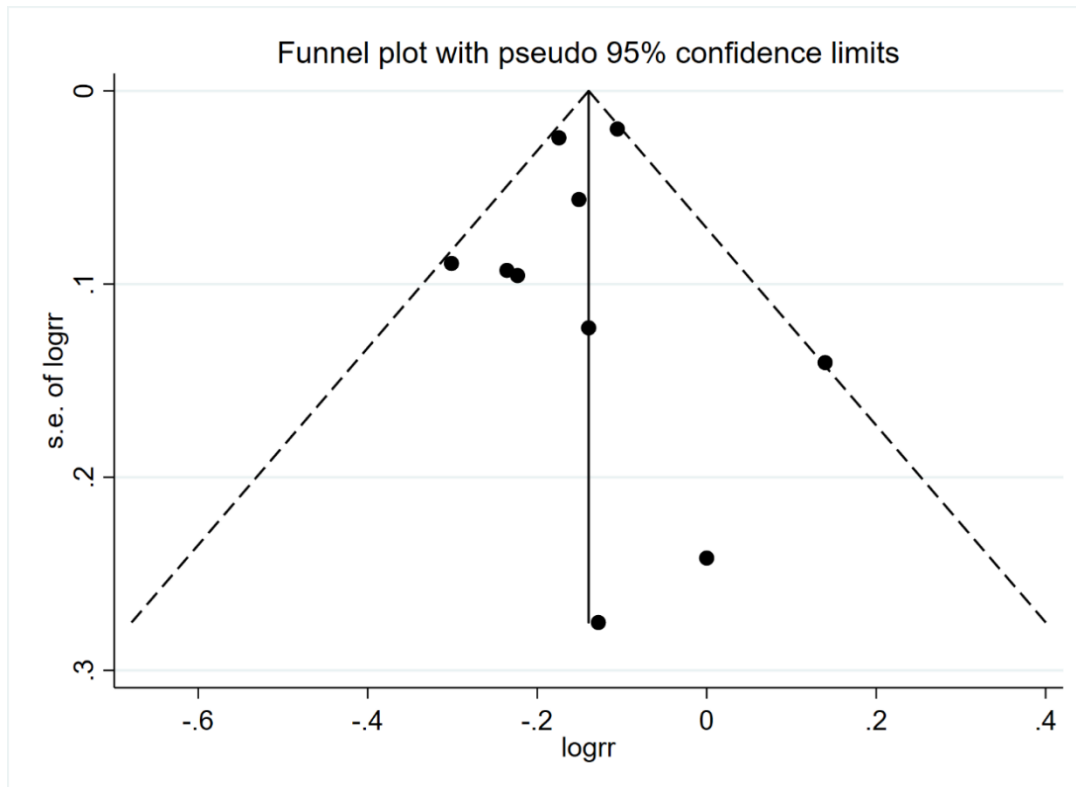

**Figure S4.** Funnel plot of the RR of 10 articles on marine n-3 PUFA intake and CVD mortality risk. No evidence of publication bias was noted. RR, relative risk; n-3 PUFA, n-3 polyunsaturated fatty acids; CVD, cardiovascular disease.

**Table S1.** Quality assessment of studies investigating fish intake and CVD mortality risk.

| Study               | Representativeness of the Exposed Cohort | Selection of the Non-exposed Cohort | Ascertainment of Exposure | Demonstration that Outcome of Interest at Start of Study | Comparability of Cohorts on the Basis of the Design or Analysis | Assessment of outcome | Follow-Up Long Enough for the Outcomes to Occur | Adequacy of Follow-Up of Cohorts | Grades            |
|---------------------|------------------------------------------|-------------------------------------|---------------------------|----------------------------------------------------------|-----------------------------------------------------------------|-----------------------|-------------------------------------------------|----------------------------------|-------------------|
| Mohan 2021          | -                                        | ☆                                   | ☆                         | -                                                        | ☆☆                                                              | ☆                     | -                                               | ☆                                | ☆☆☆☆<br>☆☆        |
| Kobayashi2019       | ☆                                        | ☆                                   | ☆                         | ☆                                                        | ☆☆                                                              | ☆                     | ☆                                               | ☆                                | ☆☆☆☆<br>☆         |
| Kondo 2019          | ☆                                        | ☆                                   | ☆                         | ☆                                                        | ☆                                                               | ☆                     | ☆                                               | ☆                                | ☆☆☆☆<br>☆☆☆☆      |
| Van den brandt 2019 | ☆                                        | ☆                                   | ☆                         | ☆                                                        | ☆☆                                                              | ☆                     | ☆                                               | ☆                                | ☆☆☆☆<br>☆☆☆☆<br>☆ |
| Deng2018            | ☆                                        | ☆                                   | ☆                         | -                                                        | ☆☆                                                              | ☆                     | ☆                                               | -                                | ☆☆☆☆<br>☆☆☆       |
| Henge               | ☆                                        | ☆                                   | ☆                         | ☆                                                        | ☆☆                                                              | ☆                     | ☆                                               | ☆                                | ☆☆☆☆              |

|         |   |   |   |   |    |   |   |   |  |      |
|---------|---|---|---|---|----|---|---|---|--|------|
| veld20  |   |   |   |   |    |   |   |   |  | ☆☆☆☆ |
| 18      |   |   |   |   |    |   |   |   |  | ☆    |
| Zhang   | ☆ | ☆ | ☆ | ☆ | ☆☆ | ☆ | ☆ | - |  | ☆☆☆☆ |
| 2018    |   |   |   |   |    |   |   |   |  | ☆☆☆☆ |
| Bellavi |   |   |   |   |    |   |   |   |  | ☆☆☆☆ |
| a2017   | ☆ | ☆ | ☆ | ☆ | ☆☆ | ☆ | ☆ | ☆ |  | ☆☆☆☆ |
|         |   |   |   |   |    |   |   |   |  | ☆    |
| Nahab   | ☆ | ☆ | ☆ | ☆ | ☆☆ | ☆ | - | - |  | ☆☆☆☆ |
| 2016    |   |   |   |   |    |   |   |   |  | ☆☆☆  |
| Owen2   | ☆ | ☆ | ☆ | - | ☆☆ | ☆ | - | ☆ |  | ☆☆☆☆ |
| 016     |   |   |   |   |    |   |   |   |  | ☆☆☆  |
| Eguchi  | ☆ | ☆ | ☆ | ☆ | ☆☆ | ☆ | ☆ | - |  | ☆☆☆☆ |
| 2014    |   |   |   |   |    |   |   |   |  | ☆☆☆☆ |
| Takata  | ☆ | ☆ | ☆ | - | ☆  | ☆ | - | ☆ |  | ☆☆☆☆ |
| 2013    |   |   |   |   |    |   |   |   |  | ☆☆   |
| Tomas   |   |   |   |   |    |   |   |   |  |      |
| allo201 | ☆ | ☆ | ☆ | - | ☆  | ☆ | ☆ | ☆ |  | ☆☆☆☆ |
| 0       |   |   |   |   |    |   |   |   |  | ☆☆☆  |
| Yamag   | ☆ | ☆ | ☆ | ☆ | ☆  | ☆ | ☆ | - |  | ☆☆☆☆ |

|         |   |   |   |   |    |   |   |   |      |
|---------|---|---|---|---|----|---|---|---|------|
| ishi200 |   |   |   |   |    |   |   |   | ☆☆☆  |
| 8       |   |   |   |   |    |   |   |   |      |
| Folso   | ☆ | ☆ | ☆ | - | ☆☆ | ☆ | ☆ | - | ☆☆☆☆ |
| m2004   |   |   |   |   |    |   |   |   | ☆☆☆  |
| Gillum  |   |   |   |   |    |   |   |   | ☆☆☆☆ |
| 2000    | ☆ | ☆ | ☆ | ☆ | ☆☆ | ☆ | ☆ | ☆ | ☆☆☆☆ |
|         |   |   |   |   |    |   |   |   | ☆    |
| Albert  | - | ☆ | ☆ | ☆ | ☆☆ | ☆ | ☆ | ☆ | ☆☆☆☆ |
| 1998    |   |   |   |   |    |   |   |   | ☆☆☆☆ |
| Davigl  | ☆ | ☆ | ☆ | - | ☆☆ | ☆ | ☆ | ☆ | ☆☆☆☆ |
| us1997  |   |   |   |   |    |   |   |   | ☆☆☆☆ |

CVD, cardiovascular disease

**Table S2.** Quality assessment of studies investigating marine n-3 PUFA intake and CVD mortality risk.

| Study           | Representative<br>ness of the Exp<br>osed Cohort | Selection of<br>the Non<br>exposed C<br>ohort | Ascertainme<br>nt of Exposu<br>re | Demonstration<br>that Outcome<br>of Interest at St<br>art of Study | Comparability of<br>Cohorts on the Ba<br>sis of the Design o<br>f Analysis | Assessment<br>of outcome | Follow-Up L<br>ong<br>Enough for t<br>he Outcomes<br>to Occur | Adequacy of<br>Follow-Up o<br>f Cohorts | Grades    |
|-----------------|--------------------------------------------------|-----------------------------------------------|-----------------------------------|--------------------------------------------------------------------|----------------------------------------------------------------------------|--------------------------|---------------------------------------------------------------|-----------------------------------------|-----------|
| Donat-Varga2020 | ☆                                                | ☆                                             | ☆                                 | ☆                                                                  | ☆☆                                                                         | ☆                        | ☆                                                             | -                                       | ☆☆☆☆☆☆☆☆  |
| Zhuang2019      | ☆                                                | ☆                                             | ☆                                 | -                                                                  | ☆☆                                                                         | ☆                        | ☆                                                             | ☆                                       | ☆☆☆☆☆☆☆☆  |
| Zhang2018       | ☆                                                | ☆                                             | ☆                                 | ☆                                                                  | ☆☆                                                                         | ☆                        | ☆                                                             | -                                       | ☆☆☆☆☆☆☆☆  |
| Rhee2016        | ☆                                                | ☆                                             | ☆                                 | ☆                                                                  | ☆☆                                                                         | ☆                        | ☆                                                             | ☆                                       | ☆☆☆☆☆☆☆☆☆ |
| Owen2016        | ☆                                                | ☆                                             | ☆                                 | -                                                                  | ☆☆                                                                         | ☆                        | -                                                             | ☆                                       | ☆☆☆☆☆☆☆☆  |
| Miyagawa2014    | ☆                                                | ☆                                             | ☆                                 | ☆                                                                  | ☆                                                                          | ☆                        | ☆                                                             | -                                       | ☆☆☆☆☆☆☆☆  |
| Bell2014        | ☆                                                | ☆                                             | ☆                                 | -                                                                  | ☆                                                                          | ☆                        | -                                                             | ☆                                       | ☆☆☆☆☆☆    |
| Koh2013         | ☆                                                | ☆                                             | ☆                                 | -                                                                  | ☆☆                                                                         | ☆                        | ☆                                                             | ☆                                       | ☆☆☆☆☆☆☆☆  |
| Takata2013      | ☆                                                | ☆                                             | ☆                                 | -                                                                  | ☆                                                                          | ☆                        | -                                                             | ☆                                       | ☆☆☆☆☆☆    |
| Kamphuis2006    | ☆                                                | ☆                                             | ☆                                 | ☆                                                                  | ☆☆                                                                         | ☆                        | ☆                                                             | -                                       | ☆☆☆☆☆☆☆☆  |

CVD, cardiovascular disease
